# Supplementary material for: Deciphering the Labyrinthine System of the Immune Microenvironment in Recurrent Glioblastoma: Recent Original Advances and Lessons from Clinical Immunotherapeutic Approaches
Source: MDPI journal article supplement (doi:10.3390/cancers13246156), 2021-12-07
Supplement: s1 [file s1]

## Supplementary Data

### Deciphering the labyrinthine system of the immune microenvironment in recurrent glioblastoma: recent original advances and lessons from clinical immunotherapeutic approaches

Anghileri E., Patanè M., et al

#### Clinical characteristics

Patient #1, 59 years-old man, underwent surgery due to right parietal primary unmethylated pMGMT-GBM; then, he was treated with radiotherapy and chemotherapy as Stupp protocol. For local recurrence, after 16 months from the first surgery, he underwent to second gross total resection and enrolled in DENDR2 clinical study (NCT04002804): he recurred before starting immunotherapy (at 1.7 months from last surgery). Finally, he was treated with four doses of vaccines and recurred 2.3 months later, succumbing to further tumor progression after 7.4 months from the last surgery.

Patient #2, a 53 years-old woman, underwent her first surgery for MGMT unmethylated GBM located in the left parietal, occipital lobes; then, she was treated by Stupp protocol. After 16 months, the patient underwent a second surgery upon recurrence and was treated with an experimental drug with no response at a 2-month follow-up. At 20 months from the first operation, another surgery was done, followed by DENDR2 immunotherapy completed as for protocol. She died after 9.3 months from the last surgery due to recurrence.

Patient #3 had a diagnosis of histological grade II glioma diagnosed when she was 20 years old. Six years later, she underwent a second surgery for GBM, methylated in MGMT promoter and carrying the IDH1R132H mutation. Then she was treated with RT and TMZ as the standard of care with transitory disease stability. Six years later, GBM recurred, and the patient, after a second surgery,

was enrolled in the DENDR2 clinical study (NCT04002804) and treated with DC immunotherapy and TMZ as an adjuvant. Unfortunately, she succumbed to another recurrence of the tumor 25 months after her last surgery.

Patient #4 underwent her first surgery for MGMT methylated, IDH1H132S high-grade glioma when she was 37 years old and was treated by Stupp protocol. After 14 months, the patient underwent a second surgery upon recurrence and then was enrolled in the DENDR2 clinical study. She is still alive at 83 months from the second surgery.

## ***Methods***

### **RNA extraction and real-time PCR**

Total RNA was extracted from frozen specimens using Trizol (ThermoFisher) and reverse-transcribed using the High-Capacity cDNA synthesis kit (ThermoFisher). The expression of genes was assessed by real-time PCR with the SYBRgreen method. Primers were defined using Primer Blast software (primers reported in Table S2). RNA from the commercially available normal brain (ThermoFisher) was used as a calibrator to calculate fold expression levels using the  $\Delta\Delta C_t$  method. The expression levels of target genes were normalized to the expression level of beta-actin.

### **Immunohistochemistry (IHC) and semiquantitative analysis of the immune infiltration**

Paraffin-embedded 3  $\mu$ m-thick sections were processed using AutostainerPlus (Dako, Agilent, Denmark), and antigen retrieval was performed in a PT Link pretreatment module (Dako, Agilent, Denmark) when requested. Briefly, slides were first blocked in 3% H<sub>2</sub>O<sub>2</sub> (Sigma-Aldrich, USA), and then they were incubated with normal goat serum (Dako, Agilent, Denmark) and with the primary antibodies against the following: PD-L1 (1:100), CD3 (dilution 1:50), CD8 (dilution 1:50), and CD4 (dilution 1:50), (Dako, Agilent, Denmark), HLA-DR (dilution 1:50), CD163/MRQ-26 for microglia/macrophages (pre-diluted 1:2). Subsequently, sections were incubated with anti-mouse or anti-rabbit Envision conjugated with peroxidase-conjugated (Dako, Denmark) as a secondary antibody. Finally, slides were reacted with diaminobenzidine (DAB Substrate Chromogen System, Dako, Denmark) and counterstained with hematoxylin. Aperio Cs2 scanScope and ImageScope software were used for the semiquantitative analysis of staining levels.

Table S1. Patient's characterization

| Characteristics |        |                  |                     |              | % Staining cells |     |      |       |        |       |
|-----------------|--------|------------------|---------------------|--------------|------------------|-----|------|-------|--------|-------|
|                 | Gender | IDH1             | MGMT<br>methylation | OS<br>months | CD4              | CD8 | CD68 | CD163 | HLA-DR | PD-L1 |
| pt #1           | M      | Wt               | U                   | 23.8         | 0                | 5   | 35   | 45    | 30     | 0     |
| pt #2           | F      | Wt               | U                   | 29.2         | 0                | 5   | 35   | 55    | 45     | 3     |
| pt #3           | F      | Mut<br>IDH1H132S | M                   | 25           | 15               | 55  | 50   | 75    | 70     | 20    |
| pt #4           | F      | Mut<br>IDH1R132H | M                   | >100         | 30               | 25  | 30   | 60    | 55     | 15    |

**Table S2. Forward and reverse primers**

| Gene       | Forward                   | Reverse               |
|------------|---------------------------|-----------------------|
| IL-6       | CCAGAGCTGTGCAGATGAGT      | GTTGGGTCAGGGGTGGTTAT  |
| IL-10      | TTGGGGCTTCCTAACTGCTA      | TGGTTGGGGAATGAGGTTAG  |
| MMP14      | AGCATTGGGTGTTTGATGAGG     | TCCAGAAGAGAGCAGCATCAA |
| IL-1B      | CTCCAGGGACAGGATATGGA      | CCCAAGGCCACAGGTATTTTG |
| CSF1R      | AAAAGTCCTGACCCTCAACC      | TCTACCACCCGGAAGAACAT  |
| YKL40      | GATGTGACGCTCTACGGCAT      | CCCAAAGTTCCATCCTCCGA  |
| TOX        | TTACACTCACCCACC           | ATTGCCTGGGTGACA       |
| EOMES      | ATGGGTGACCTGTGGCAAAG      | TCCTGTCTCATCCAGTGGGA  |
| BLIMP-1    | GTGTGGTATTGTCGGGACTTTG    | CAGTGCTCGGTTGCTTTAGAC |
| T-BET      | CAAGGATTCCGGGAGAACT       | TAGTGATCTCCCCAAGGAA   |
| GATA3      | CGTTTTTCTGCCGTACCC        | GGAAGCAACGTGAGCAAA    |
| P2RY12     | CCAGGAAAAAGGTGAACGTC      | TGGCTCAGGGTGTAAGGAAT  |
| TMEM119    | GTACGTGATGCTGATTGCTGT     | AAGGACGATGGGTAATAGGC  |
| IFNG       | CATCCAAGTGATGGCTGAAC      | CTTCGACCTCGAAACAGCAT  |
| PD1        | TGGAATATGGGGAGCTGGATT     | ACAATGGTGGCATACTCCGTC |
| CCL4       | CCCAGCCAGCTGTGGTATTC      | CATACACGTACTCCTGGACCC |
| CCL5       | CTGCTGCTTTGCCTACATTG      | GGTTCTTTCGGGTGACAAAG  |
| beta-actin | GTCATTCCAAATATGAGATGCGTTG | TGTGGACTTGGGAGAGGACT  |
